# Supplementary material for: Chronic Δ9-THC Exposure Differently Affects Histone Modifications in the Adolescent and Adult Rat Brain
Source: PubMed Central journal article supplement (PMC5666776; doi:10.3390/ijms18102094), 2017-10-04
Supplement: ijms-18-02094-s001.pdf [file ijms-18-02094-s001.pdf]

Supplementary Materials

Adolescent Hippocampus  
24 hours

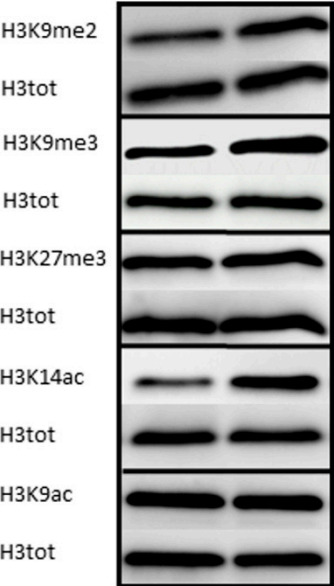

Figure S1. Representative blots of adolescent THC effect on histone modifications occurring in the hippocampus 24 hours after the last THC injection.
